# Supplementary material for: Cystic Fibrosis Defective Response to Infection Involves Autophagy and Lipid Metabolism
Source: MDPI journal article supplement (doi:10.3390/cells9081845), 2020-08-06
Supplement: s1 [file s1]

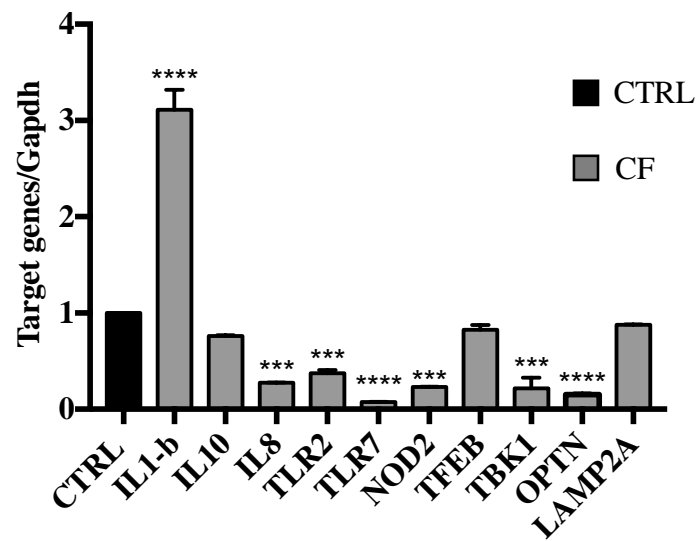

**Supplementary figure 1.** Quantification of the expression of genes involved in inflammation, response to infection and autophagy: pro-inflammatory *IL1β* interleukin; pro-inflammatory *IL-8* chemokine; anti-inflammatory *IL10* interleukin; Pathogens recognition receptors (PRRs): *NOD2*, *TLR2* and *TLR7*; *TFEB*; *TBK1*; *OPTN*; *LAMP2a* by qRT-PCR in CF versus CTRL bronchial epithelial cells. *GAPDH* was used as a housekeeping gene. Data, derived for triplicate samples, are expressed as mean±SE (\*\* p<0.001; \*\*\*\* p<0.0001); 2-way Anova followed by Bonferroni correction was used for all data.
