# Supplementary material for: Cystic Fibrosis Defective Response to Infection Involves Autophagy and Lipid Metabolism
Source: MDPI journal article supplement (doi:10.3390/cells9081845), 2020-08-06
Supplement: s1 [file s1]

Supplementary Table 1: demographics and clinical features of cohort 1 (F508del/F508del) and cohort 2 (F508del/other)

|                                                        | Cohort 1 (n=22)       | Cohort 2 (n=21)                                                                                                             |
|--------------------------------------------------------|-----------------------|-----------------------------------------------------------------------------------------------------------------------------|
| Genotype (%)                                           | F508del/F508del (100) | F508del/N1303K (33,3)<br>F508del/G542X (28,6)<br>F508del/G85E (19,0)<br>F508del/del es 22-24 (14,3)<br>F508del/W1282X (4,8) |
| Gender (F/M)                                           | 9/13                  | 15/6                                                                                                                        |
| Average age (years)                                    | 22,4                  | 29,6                                                                                                                        |
| Sweat chloride > 60mmol/L                              | 22 (100)              | 21 (100)                                                                                                                    |
| Median FEV1 (% pred); range                            | 65; 22-118            | 72; 39-98                                                                                                                   |
| Median BMI; range                                      | 19,48; 15,20-23,46    | 20,66; 14,95-23,53                                                                                                          |
| Clinical features:                                     |                       |                                                                                                                             |
| - Pancreas insufficiency (%)                           | 22 (100)              | 19 (90,5)                                                                                                                   |
| - CFRD (%)                                             | 3 (13,6)              | 6 (28,6)                                                                                                                    |
| - Liver disease                                        |                       | 6 (28,6)                                                                                                                    |
| - Nasal polyps (%)                                     | 9 (40,1)              | 5 (23,8)                                                                                                                    |
| - Malnutrition (%)                                     | 3 (13,6)              | 3 (14,2)                                                                                                                    |
| - Respiratory failure                                  | 4 (18,1)              | 1 (4,8)                                                                                                                     |
| - >2 pulmonary exacerbations in the last 12 months (%) | 9 (40,1)              | 12 (57,1)                                                                                                                   |
| - Lung transplant (%)                                  | 0 (0)                 | 1 (4,8)                                                                                                                     |
| N° patients on CFTR modulators therapy                 | 12 (54,5)             | 0 (0)                                                                                                                       |
| Chronic lung infection                                 |                       |                                                                                                                             |
| - Pseudomonas aeruginosa                               | 13 (59,1)             | 15 (71,4)                                                                                                                   |
| - MSSA                                                 | 18 (81,8)             | 19 (90,4)                                                                                                                   |
| - MRSA                                                 | 1 (4,5)               | 2 (9,5)                                                                                                                     |
| - Aspergillus fumigatus_                               | 4 (18,1)              | 8 (38,1)                                                                                                                    |

CFRD = CF related diabetes; MSSA = Methicillinum Sensible Staphylococcus aureus; MRSA = Methicillinum Resistant Staphylococcus aureus
